# Supplementary material for: The 5΄ UTR of the type I toxin ZorO can both inhibit and enhance translation
Source: PubMed Central journal article supplement — Nucleic Acids Res. 2016 Nov 28;45(7):4006–20. doi: 10.1093/nar/gkw1172 (PMC5397157; doi:10.1093/nar/gkw1172), 2016-11-28

The 5' UTR of the type I toxin ZorO can both inhibit and enhance translation

Jia Wen#, John R. Harp, and Elizabeth M. Fozo\*

Author Affiliations

Department of Microbiology, University of Tennessee, Knoxville, Tennessee 37996 USA

#Current address: Department of Molecular Genetics and Microbiology, Duke University, Durham, NC

\*To whom correspondence should be addressed. Tel: +1 865 974 4028; Fax: +1 865-974-4007; Email:

[efozo@utk.edu](mailto:efozo@utk.edu)

Supplemental Table S1. Strains and Plasmids used in this study.

| Name                                 | Relevant genotype or description              | Source       |
|--------------------------------------|-----------------------------------------------|--------------|
| <i>Escherichia coli</i> EDL933       | <i>E. coli</i> O157:H7, EHEC                  | D. Friedman  |
| DJ480                                | MG1655 $\Delta lacX74$                        | D. Jin, (55) |
| UTK007                               | DJ480 PCP18- <i>araE</i>                      | (18)         |
| UTK011                               | UTK007 $\Delta rnc::kan$                      | (18)         |
| Plasmids                             |                                               |              |
| pFA6a-GFP(S65T)-kanMX6               | Amp <sup>R</sup> ; Km <sup>R</sup>            | (23)         |
| pEF21                                | Cm <sup>R</sup> ; P <sub>BAD</sub> promoter   | (9)          |
| pEF21- <i>zorO</i> full-length       | Cm <sup>R</sup>                               | (18)         |
| pEF21- <i>zorO</i> $\Delta 28$       | Cm <sup>R</sup>                               | This study   |
| pAZ3                                 | Cm <sup>R</sup> ; P <sub>BAD</sub> promoter   | (8)          |
| pAZ3- <i>zorO</i> full-length        | Cm <sup>R</sup>                               | This study   |
| pAZ3- <i>zorO</i> $\Delta 28$        | Cm <sup>R</sup>                               | This study   |
| pAZ3- <i>zorO</i> $\Delta 34$        | Cm <sup>R</sup>                               | This study   |
| pAZ3- <i>zorO</i> $\Delta 50$        | Cm <sup>R</sup>                               | This study   |
| pAZ3- <i>zorO</i> $\Delta 82$        | Cm <sup>R</sup>                               | This study   |
| pAZ3- <i>zorO</i> $\Delta 82$ RBS    | Cm <sup>R</sup>                               | This study   |
| pAZ3- <i>zorO</i> UTR- <i>gfp</i>    | Cm <sup>R</sup>                               | This study   |
| pAZ3- $\Delta 28$ UTR- <i>gfp</i>    | Cm <sup>R</sup>                               | This study   |
| pBR-pLac                             | Amp <sup>R</sup> ; P <sub>LacO</sub> promoter | (55)         |
| pBR-pLac- <i>orzO</i>                | Amp <sup>R</sup>                              | (18)         |
| pGEM®-3Zf(+)                         | Amp <sup>R</sup> ; T7 promoter                | Promega      |
| pGEM-T7- <i>zorO</i> full-length     | Amp <sup>R</sup>                              | This study   |
| pGEM-T7- <i>zorO</i> $\Delta 50$     | Amp <sup>R</sup>                              | This study   |
| pGEM-T7- <i>zorO</i> $\Delta 82$     | Amp <sup>R</sup>                              | This study   |
| pGEM-T7- <i>zorO</i> $\Delta 82$ RBS | Amp <sup>R</sup>                              | This study   |

Supplementary Table S2. Oligonucleotides used in this study.

| Name   | Sequence <sup>a</sup>                                                      | Use                                                                                                                                            |
|--------|----------------------------------------------------------------------------|------------------------------------------------------------------------------------------------------------------------------------------------|
| EF524  | GTTGGTACGAAACGTTGCTCTCCG                                                   | Northern analysis of <i>zorO</i> , <i>zorO</i> UTR- <i>gfp</i> and their derivatives                                                           |
| EF1432 | CGGCGCTACGGCGTTTCACTTCTG                                                   | Northern analysis of 5s                                                                                                                        |
| EF1065 | CAGTGAGTGAGATTTATAATCGAATTCGTTGGGAG                                        | pAZ3- <i>zorO</i> full-length PCR; pAZ3- <i>zorO</i> UTR- <i>gfp</i> PCR; pGEM-T7- <i>zorO</i> full-length PCR                                 |
| EF1068 | ATACTCAAGCTTATTAAAGTCGCAGCACATGCAAC                                        | pAZ3- <i>zorO</i> full-length PCR; pAZ3- <i>zorO</i> Δ28 PCR; pAZ3- <i>zorO</i> Δ50 PCR; pAZ3- <i>zorO</i> Δ82 PCR; pEF21- <i>zorO</i> Δ28 PCR |
| EF1141 | GGTTGTGCCGGATCGGAATTCCTTTTAAGTCCTGGCTGC                                    | pAZ3- <i>zorO</i> Δ28 PCR; pAZ3-Δ28 UTR- <i>gfp</i> PCR                                                                                        |
| EF1127 | GACCAAGAATTCGTCCTGGCTGCCGGACGGGTGGTGCCGC                                   | pAZ3- <i>zorO</i> Δ34 PCR                                                                                                                      |
| EF1066 | GATAATTAAGCTTGCAGCACATGCAACTTGAAG                                          | pAZ3- <i>zorO</i> Δ34 PCR                                                                                                                      |
| EF1170 | CAATTTTAAGTCCTGGCTGGAATTCGGGTGGTGCCGCAGGC                                  | pAZ3- <i>zorO</i> Δ50 PCR; pGEM-T7- <i>zorO</i> Δ50 PCR                                                                                        |
| EF392  | GCCCTGGAATTCAGAGCAACGTTTCGTACCAAC                                          | pAZ3- <i>zorO</i> Δ82 PCR; pGEM-T7- <i>zorO</i> Δ82 PCR                                                                                        |
| EF1290 | GTGTAAGGGTAAGGTGCTGGTGTTCGCTGGTAATAAGGA<br>GAGCGGATGGACACGCTGAC            | pAZ3- <i>zorO</i> Δ82 RBS PCR; pGEM-T7- <i>zorO</i> Δ82 RBS PCR                                                                                |
| EF1291 | GTCAGCGTGTCATCCGCTCTCCTTATTACCAACGCAACAC<br>CAGCACCTTACCCTTACAC            | pAZ3- <i>zorO</i> Δ82 RBS PCR; pGEM-T7- <i>zorO</i> Δ82 RBS PCR                                                                                |
| EF1181 | GAAAAGTTCTTCTCCTTTCATCCGCTCTCCTTATTAAGG                                    | pAZ3- <i>zorO</i> UTR- <i>gfp</i> PCR                                                                                                          |
| EF1182 | CCTTAATAAGGAGAGCGGATGAAAGGAGAAGAACTTTTC                                    | pAZ3- <i>zorO</i> UTR- <i>gfp</i> PCR                                                                                                          |
| EF1183 | GAAATTCGCTTATTTAGAAAGCTTCGCGCCCTATTTGTATAG                                 | pAZ3- <i>zorO</i> UTR- <i>gfp</i> PCR                                                                                                          |
| EF1328 | GGTTGTGCCGGATCGCTGCAGTTTTTAAGTCCTGGCTGC                                    | pEF21- <i>zorO</i> Δ28 PCR                                                                                                                     |
| EF1343 | GAGTATAGCTCCCGGGAAGGGGAAACGGTATTC                                          | pGEM- T7 <i>zorO</i> full-length PCR; pGEM-T7- <i>zorO</i> Δ50 PCR; pGEM-T7- <i>zorO</i> Δ82 PCR; T7- <i>zorO</i> Δ28 PCR                      |
| EF1408 | GAGTCTGCAGAAGCTTTAATACGACTCACTATAGGGCGAAT<br>TCTTTTAAGTCCTGGCTGCCGGACGGGTG | T7- <i>zorO</i> Δ28 PCR                                                                                                                        |

<sup>a</sup> 5' - 3', restriction sites underlined, nucleotides altered via site directed mutagenesis in red.

Supplemental Figure S1. No difference in fluorescence intensity between the uninduced controls of pAZ3- *zorO* UTR-*gfp* and pAZ3- $\Delta$ 28 UTR-*gfp*. Shown are flow cytometry analyses of the fluorescence intensity of GFP from cells harboring pAZ3- *zorO* UTR-*gfp* or pAZ3- $\Delta$ 28 UTR-*gfp* without arabinose induction. Lines indicate time post induction. Shown is a representative of three independent experiments.

Supplemental Figure S2. *In vitro* structure probing of 3'-end-labeled *zorO* and its derivatives. 3'-end-labeled *zorO* full-length, *zorO*  $\Delta$ 28, *zorO*  $\Delta$ 50, or *zorO*  $\Delta$ 82 RNA (1.67  $\mu$ M) was subjected to RNase T1 and lead(II) acetate cleavage as outlined in Figure 3A. The position of selected cleaved G residues is given at the left of the T1 ladder. Yellow lines indicate the corresponding RBS of *zorO* full-length, *zorO*  $\Delta$ 28, *zorO*  $\Delta$ 50, and *zorO*  $\Delta$ 82. For clarity, all positions are given as for *zorO* full-length mRNA from the 5' end of the transcript even though nucleotide numbers might be different in mutant RNAs.

Supplemental Figure S3. Structural changes in the full-length versus *zorO*  $\Delta$ 28. **(A)** Schematic of structural changes upon processing of *zorO* mRNA. Removal of the first 28 nt (indicated by black bracket) in the *zorO* full-length mRNA during processing leads to opening of the EAP region. For simplicity, only part of the *zorO* 5' UTR putative structure is shown. Due to some variable cleavage by RNase T1, there may be some weak structural elements that are not accounted for in this schematic. **(B)** Variable cleavage by RNase T1. Structure probing was done as in Figure 3B. Sample positions that showed experimental variation between structure probing experiments are as follows: yellow circles indicate G107 (*zorO*  $\Delta$ 28 is more sensitive in this example compared to itself in Figure 3B; the full-length is less sensitive compared to itself in as seen in Figure 3B), green circles indicate G95 (full-length is less sensitive in this example compared to itself in Figure 3B, while *zorO*  $\Delta$ 28 is equivalent); the same positions are indicated in Figure 3B for comparison. Position G75 (blue circles) is indicative of a residue whose cleavage was consistent across experiments. Note that the degree of sensitivity to cleavage may be variable between experiments; however, in all cases the residues indicated above were digested in *zorO*  $\Delta$ 28.

Supplemental Figure S4. Schematic diagram of the *zorO*  $\Delta$ 82 RBS mutant. **(A)** To generate the *zorO*  $\Delta$ 82 RBS mutant, the region (indicated by the black bar) that pairs with the RBS (indicated by yellow box) in the *zorO*  $\Delta$ 82 were mutated to release the RBS from the stem structure. Mutated nucleotides are shown in red. **(B)** Putative structure of the *zorO*  $\Delta$ 82 RBS mutant generated by Mfold (31). The RBS is indicated by yellow box and the region originally base pairing with the RBS is indicated by black bar.

Supplemental Figure S5. OrzO sRNA rescues cells from *zorO* full-length or *zorO*  $\Delta$ 28 induced toxicity in *E. coli* strain UTK007 (wild type). **(A)** *E. coli* strain UTK011 ( $\Delta$ *mrc*) carrying pBR-plac-*orzO* and pEF21-



*zorO* was induced as indicated with arabinose (0.002%) and/or IPTG (1mM). Shown are the mean values  $\pm$  standard deviations for three independent cultures. **(B)** Rescue experiment was performed as in (A) in *E. coli* strain UTK007 (wild type). Shown are the mean values  $\pm$  standard deviations for three independent cultures. **(C)** Rescue experiment was performed as in *E. coli* strain UTK007 (wild type) with *zorO*  $\Delta$ 28 expressed induced by 0.00002% arabinose and/or IPTG (1 mM). Shown are the mean values  $\pm$  standard deviations for three independent cultures.

Supplemental Figure S6. The +35 to +50 region in *zorO* full-length and *zorO*  $\Delta$ 28. *In vitro* structure probing was conducted as in Figure 3A. Purple bars indicate the corresponding +35 to +50 region of *zorO* full-length and *zorO*  $\Delta$ 50.

# Supplemental Figure S1

**pAZ3- *zorO* UTR-*gfp***

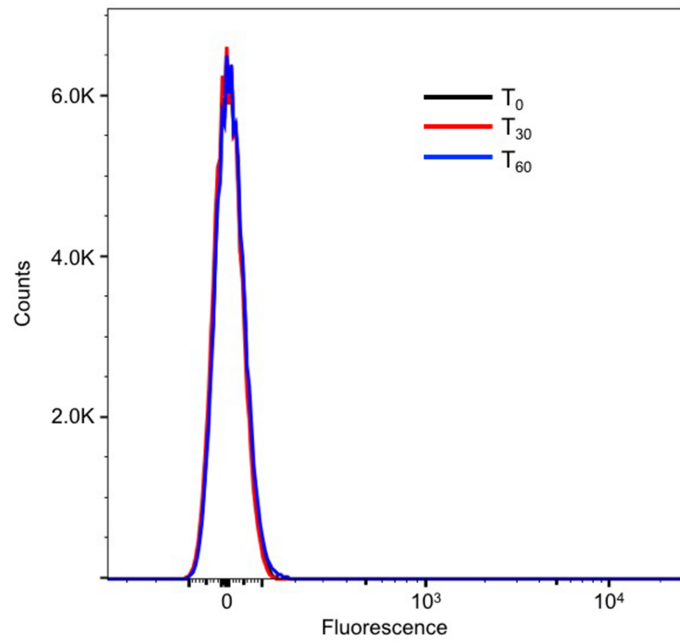

**pAZ3-  $\Delta$ 28 UTR-*gfp***

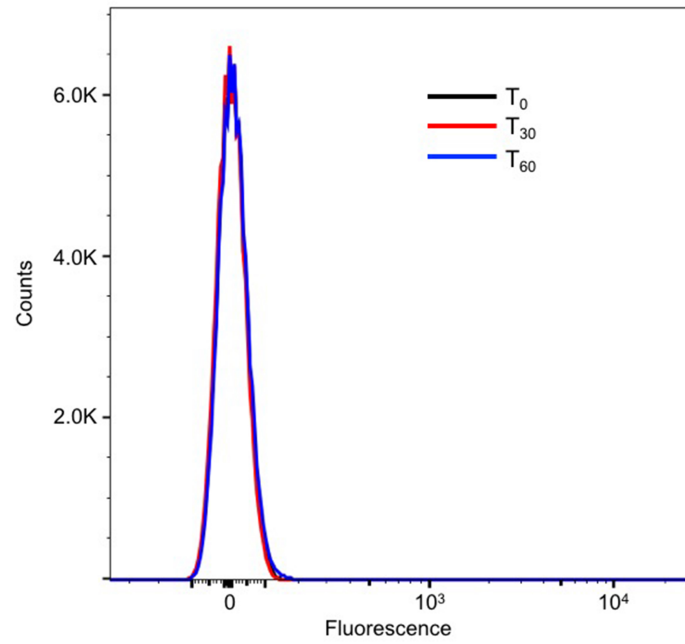

# Supplemental Figure S2

*zorO* full-length

*zorO*  $\Delta 28$

*zorO*  $\Delta 50$

*zorO*  $\Delta 82$

C

T1

OH

$\Sigma$

Lead

G90  
G95

G124  
G125

G107  
G115  
G120

G128  
G130

G134  
G135  
G136

G140  
G141  
G143

G149

G146  
G147

G174  
G177  
G178

G183  
G186

G195

G202  
G204

G211  
G214

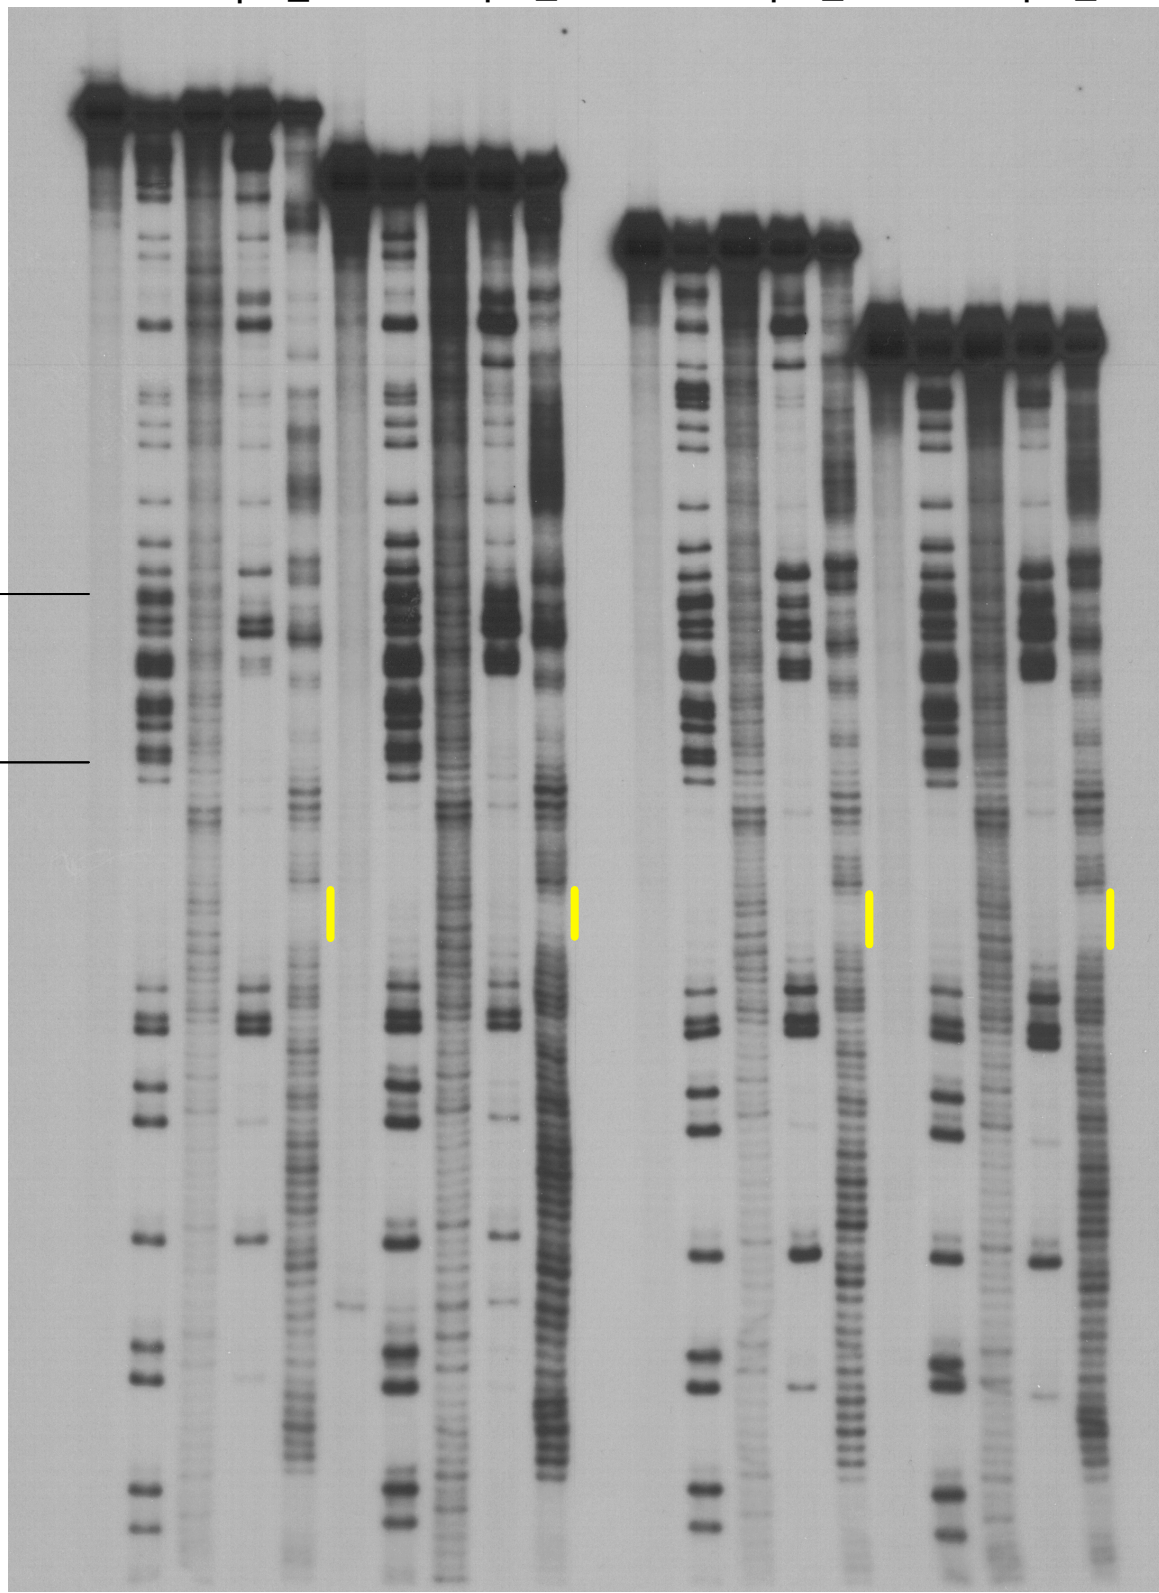

# Supplemental Figure S3A

A.

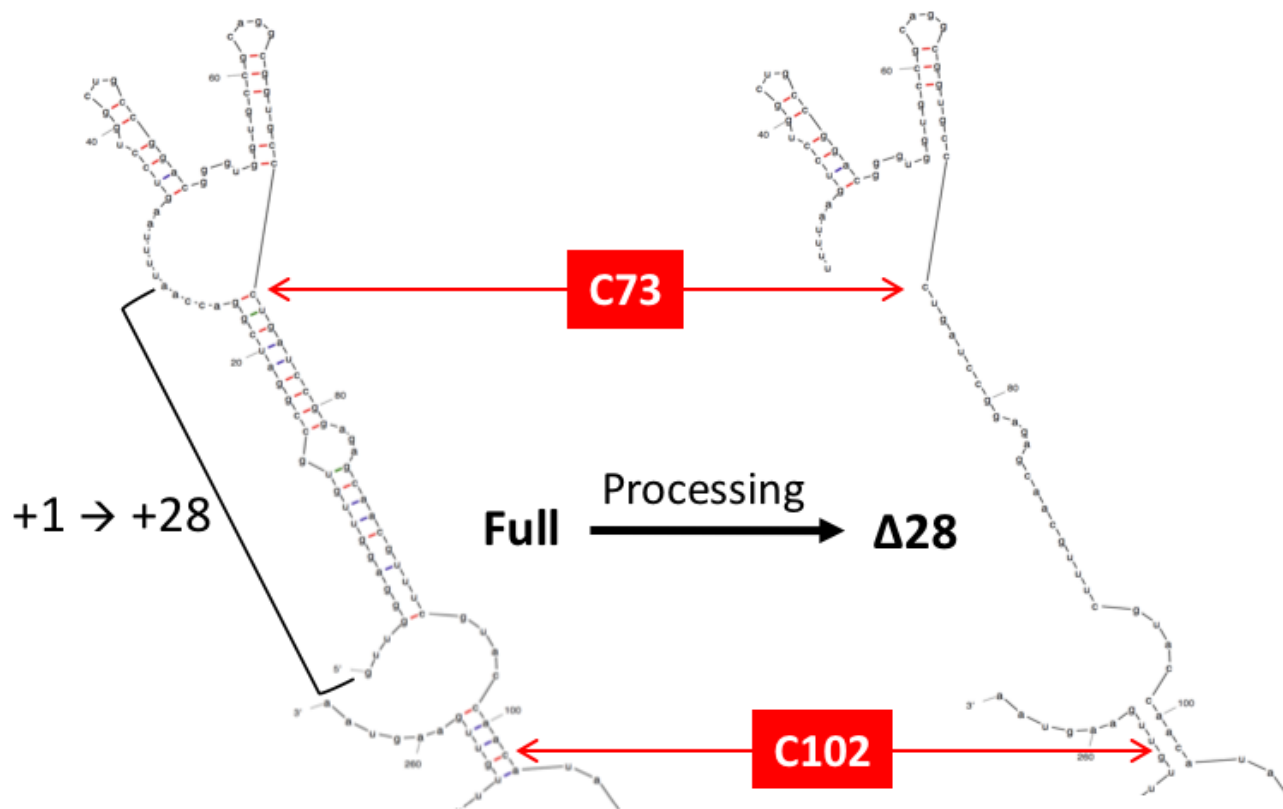

**B.**

*zorO* full-length

*zorO*  $\Delta$ 28

| C | Ladder |    | Reaction |      | C | Ladder |    | Reaction |      |
|---|--------|----|----------|------|---|--------|----|----------|------|
|   | T1     | OH | T1       | Lead |   | T1     | OH | T1       | Lead |

G107

G95

G75

G107

G95

G75

EAP (+73 - +102)

EAP (+73 - +102)

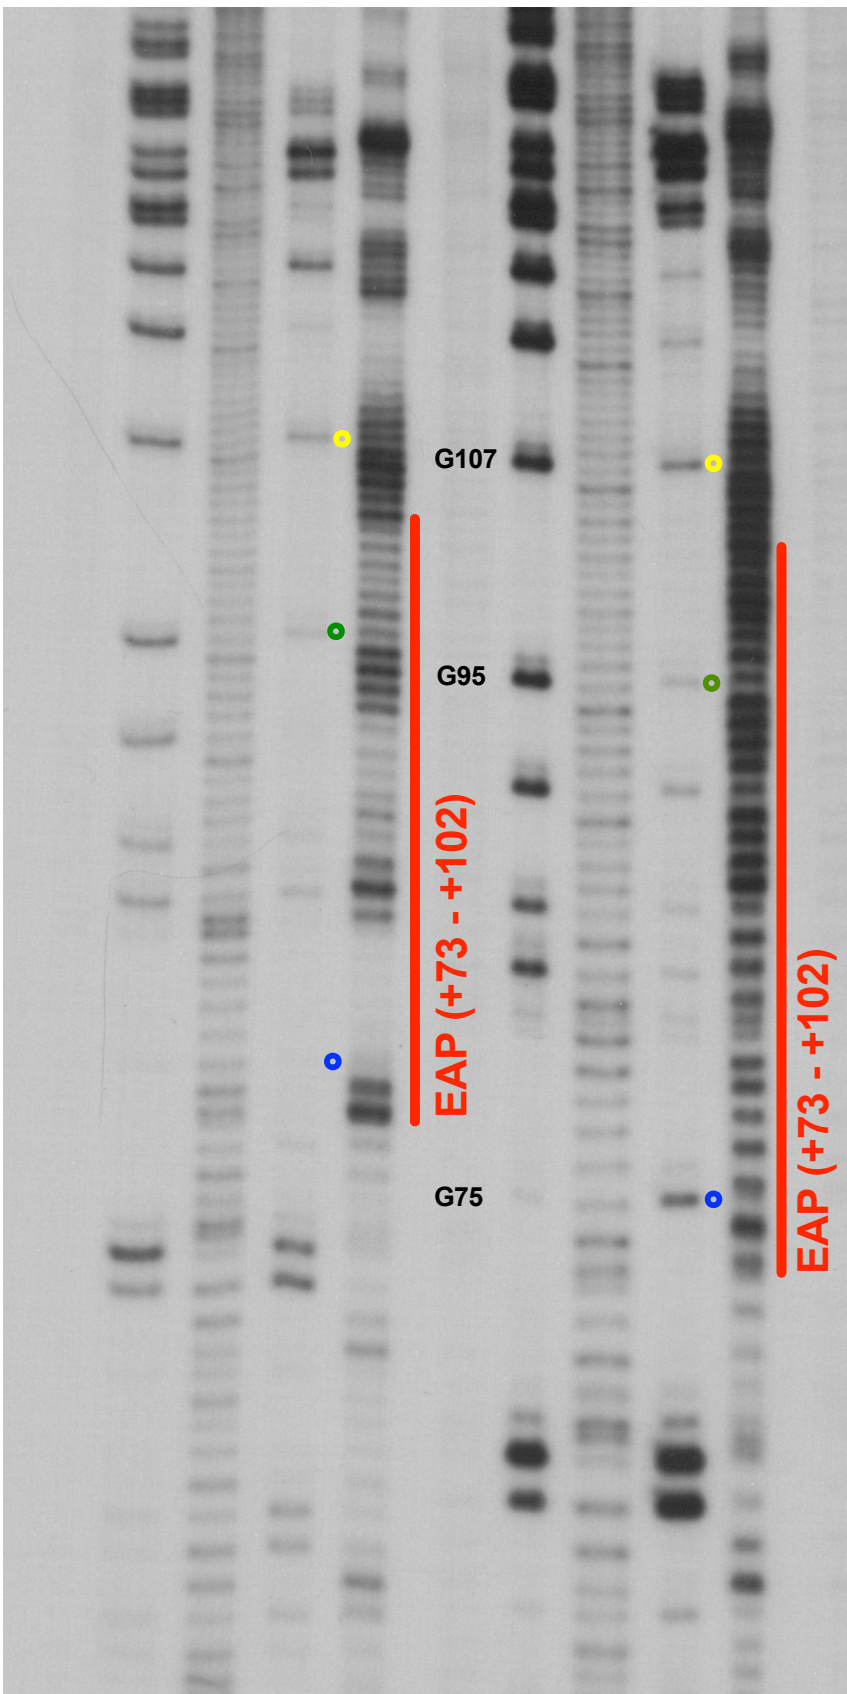

# Supplemental Figure S4

A.

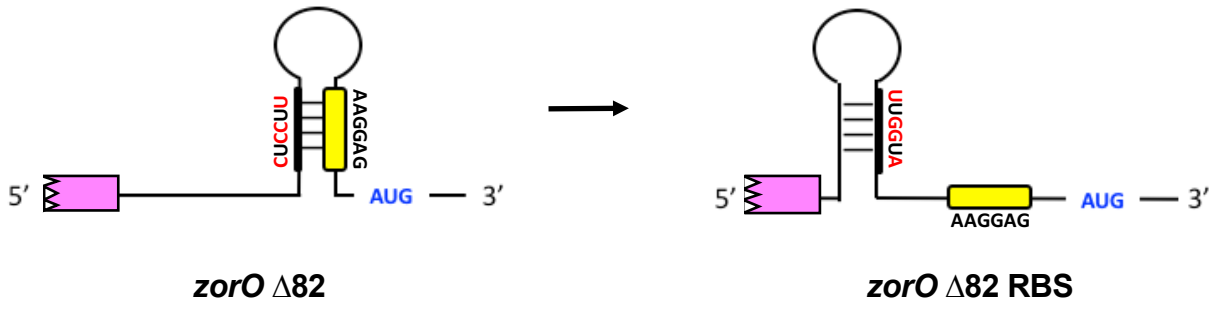

B.

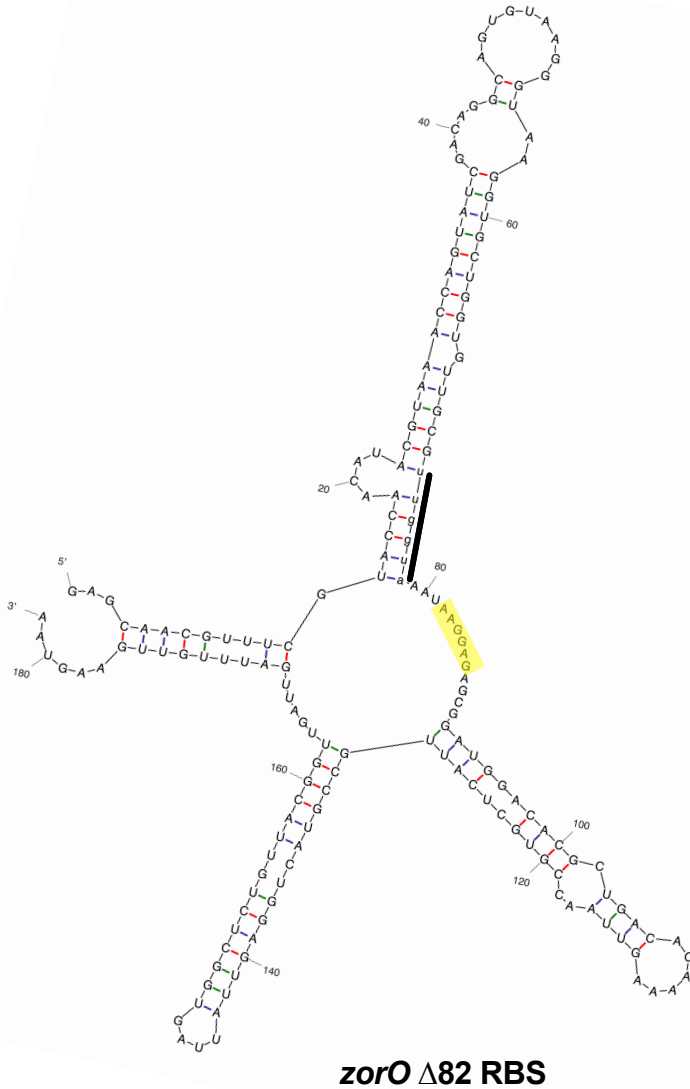

# Supplemental Figure S5

## A.

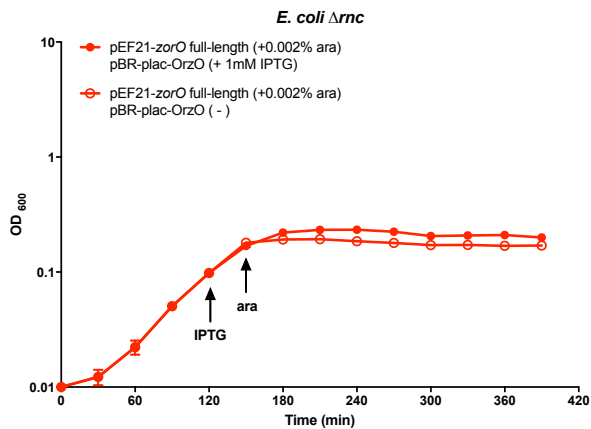

## B.

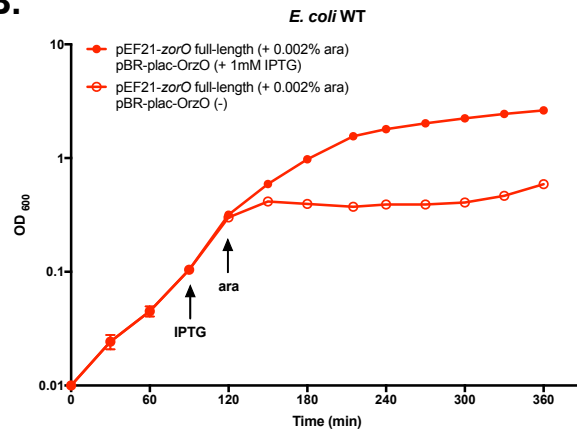

## C.

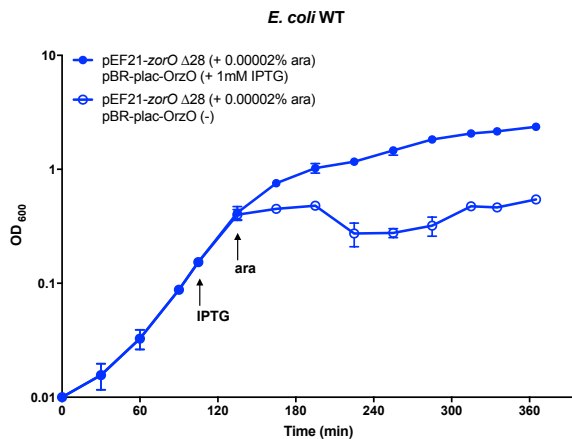



# Supplemental Figure S6

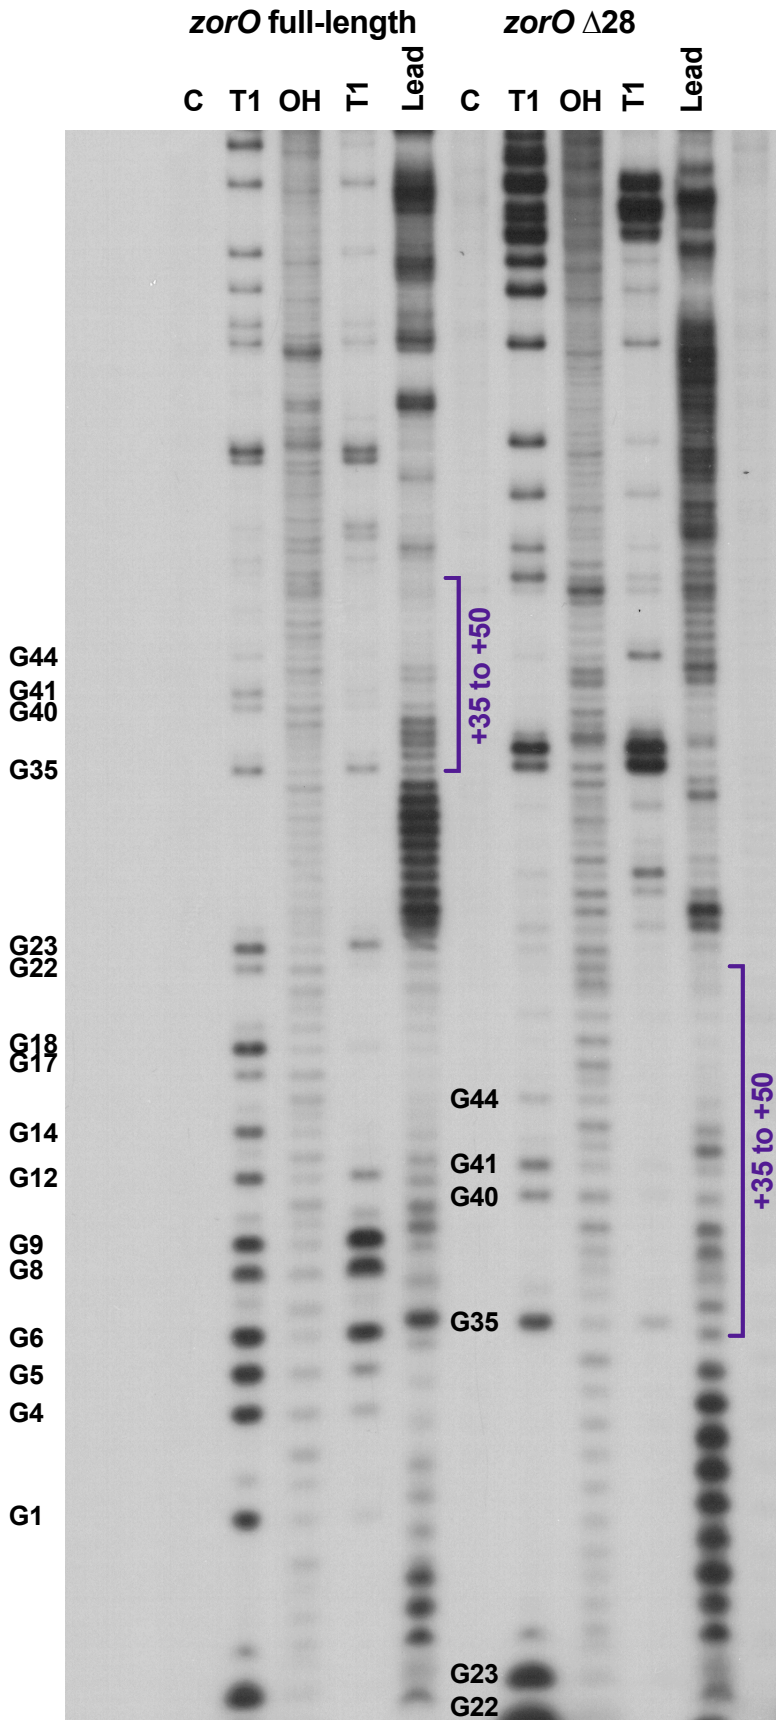

Supplement: gkw1172_Supp.pdf [file gkw1172_Supp.pdf]
